# Supplementary material for: Bright split red fluorescent proteins for the visualization of endogenous proteins and synapses
Source: PubMed Central journal article supplement (PMC6749000; doi:10.1038/s42003-019-0589-x), 2019-09-17
Supplement: 42003_2019_589_MOESM4_ESM.pdf [file 42003_2019_589_MOESM4_ESM.pdf]

## Reporting Summary

Nature Research wishes to improve the reproducibility of the work that we publish. This form provides structure for consistency and transparency in reporting. For further information on Nature Research policies, see [Authors & Referees](#) and the [Editorial Policy Checklist](#).

### Statistics

For all statistical analyses, confirm that the following items are present in the figure legend, table legend, main text, or Methods section.

n/a Confirmed

- The exact sample size ( $n$ ) for each experimental group/condition, given as a discrete number and unit of measurement
- A statement on whether measurements were taken from distinct samples or whether the same sample was measured repeatedly
- The statistical test(s) used AND whether they are one- or two-sided  
*Only common tests should be described solely by name; describe more complex techniques in the Methods section.*
- A description of all covariates tested
- A description of any assumptions or corrections, such as tests of normality and adjustment for multiple comparisons
- A full description of the statistical parameters including central tendency (e.g. means) or other basic estimates (e.g. regression coefficient) AND variation (e.g. standard deviation) or associated estimates of uncertainty (e.g. confidence intervals)
- For null hypothesis testing, the test statistic (e.g.  $F$ ,  $t$ ,  $r$ ) with confidence intervals, effect sizes, degrees of freedom and  $P$  value noted  
*Give  $P$  values as exact values whenever suitable.*
- For Bayesian analysis, information on the choice of priors and Markov chain Monte Carlo settings
- For hierarchical and complex designs, identification of the appropriate level for tests and full reporting of outcomes
- Estimates of effect sizes (e.g. Cohen's  $d$ , Pearson's  $r$ ), indicating how they were calculated

*Our web collection on [statistics for biologists](#) contains articles on many of the points above.*

### Software and code

Policy information about [availability of computer code](#)

Data collection

microManager for microscopy image collection. Described in the methods section.

Data analysis

Prism, Excel and Origin for plotting; FlowJo for flow-cytometry data analysis; ImageJ for image analysis. All described in the methods section.

For manuscripts utilizing custom algorithms or software that are central to the research but not yet described in published literature, software must be made available to editors/reviewers. We strongly encourage code deposition in a community repository (e.g. GitHub). See the Nature Research [guidelines for submitting code & software](#) for further information.

### Data

Policy information about [availability of data](#)

All manuscripts must include a [data availability statement](#). This statement should provide the following information, where applicable:

- Accession codes, unique identifiers, or web links for publicly available datasets
- A list of figures that have associated raw data
- A description of any restrictions on data availability

Data in this manuscript are available from the authors upon request.

### Field-specific reporting

Please select the one below that is the best fit for your research. If you are not sure, read the appropriate sections before making your selection.

- Life sciences       Behavioural & social sciences       Ecological, evolutionary & environmental sciences

## Life sciences study design

All studies must disclose on these points even when the disclosure is negative.

|                 |                                                                                                                                                       |
|-----------------|-------------------------------------------------------------------------------------------------------------------------------------------------------|
| Sample size     | <input type="text" value="No sample size-calculations were performed. The samples sizes were chosen based on practical limits in data acquisition."/> |
| Data exclusions | <input type="text" value="No data excluded from analysis"/>                                                                                           |
| Replication     | <input type="text" value="All experimental findings have been replicated in at least two biological replicates."/>                                    |
| Randomization   | <input type="text" value="No randomization performed."/>                                                                                              |
| Blinding        | <input type="text" value="Blinding was not relevant in the analysis of data in this manuscript."/>                                                    |

## Reporting for specific materials, systems and methods

We require information from authors about some types of materials, experimental systems and methods used in many studies. Here, indicate whether each material, system or method listed is relevant to your study. If you are not sure if a list item applies to your research, read the appropriate section before selecting a response.

### Materials & experimental systems

|                                     |                                                                 |
|-------------------------------------|-----------------------------------------------------------------|
| n/a                                 | <input type="checkbox"/> Involved in the study                  |
| <input checked="" type="checkbox"/> | <input type="checkbox"/> Antibodies                             |
| <input type="checkbox"/>            | <input checked="" type="checkbox"/> Eukaryotic cell lines       |
| <input checked="" type="checkbox"/> | <input type="checkbox"/> Palaeontology                          |
| <input type="checkbox"/>            | <input checked="" type="checkbox"/> Animals and other organisms |
| <input checked="" type="checkbox"/> | <input type="checkbox"/> Human research participants            |
| <input checked="" type="checkbox"/> | <input type="checkbox"/> Clinical data                          |

### Methods

|                                     |                                                    |
|-------------------------------------|----------------------------------------------------|
| n/a                                 | <input type="checkbox"/> Involved in the study     |
| <input checked="" type="checkbox"/> | <input type="checkbox"/> ChIP-seq                  |
| <input type="checkbox"/>            | <input checked="" type="checkbox"/> Flow cytometry |
| <input checked="" type="checkbox"/> | <input type="checkbox"/> MRI-based neuroimaging    |

## Eukaryotic cell lines

Policy information about [cell lines](#)

|                                                                      |                                                                               |
|----------------------------------------------------------------------|-------------------------------------------------------------------------------|
| Cell line source(s)                                                  | <input type="text" value="HEK 293T"/>                                         |
| Authentication                                                       | <input type="text" value="The cell line was not authenticated."/>             |
| Mycoplasma contamination                                             | <input type="text" value="Tested and identify no mycoplasma contamination."/> |
| Commonly misidentified lines<br>(See <a href="#">ICLAC</a> register) | <input type="text" value="No misidentified cell lines were used"/>            |

## Animals and other organisms

Policy information about [studies involving animals](#); [ARRIVE guidelines](#) recommended for reporting animal research

|                         |                                                                             |
|-------------------------|-----------------------------------------------------------------------------|
| Laboratory animals      | <input type="text" value="C. elegans, female"/>                             |
| Wild animals            | <input type="text" value="No wild animal used"/>                            |
| Field-collected samples | <input type="text" value="No field-collected samples were used."/>          |
| Ethics oversight        | <input type="text" value="No ethical approval is required for C. elegans"/> |

Note that full information on the approval of the study protocol must also be provided in the manuscript.

## Flow Cytometry

---

### Plots

Confirm that:

- The axis labels state the marker and fluorochrome used (e.g. CD4-FITC).
- The axis scales are clearly visible. Include numbers along axes only for bottom left plot of group (a 'group' is an analysis of identical markers).
- All plots are contour plots with outliers or pseudocolor plots.
- A numerical value for number of cells or percentage (with statistics) is provided.

### Methodology

|                           |                                                                                                  |
|---------------------------|--------------------------------------------------------------------------------------------------|
| Sample preparation        | Flow cytometry was performed on suspended cells from cultured cell line instead of tissue sample |
| Instrument                | LSR II and FACSAria II                                                                           |
| Software                  | FlowJo                                                                                           |
| Cell population abundance | Reported in Figure 4                                                                             |
| Gating strategy           | By forward scattering only, described in the methods section.                                    |

- Tick this box to confirm that a figure exemplifying the gating strategy is provided in the Supplementary Information.
